# Supplementary material for: Liquid AbobotulinumtoxinA: Pooled Data From Two Double-Blind, Randomized, Placebo-Controlled Phase III Studies of Glabellar Line Treatment
Source: PubMed Central journal article supplement — Dermatol Surg. 2022 Oct 7;48(11):1198–202. doi: 10.1097/DSS.0000000000003594 (PMC9632942; doi:10.1097/dss.0000000000003594), 2022-10-07
Supplement: ds-48-1198-s001.pdf [file ds-48-1198-s001.pdf]

**Table S1: Subject disposition (all randomized subjects)**

|                                           | <b>aboBoNT-A<br/>solution<br/>n (%)</b> | <b>Placebo<br/>n (%)</b> |
|-------------------------------------------|-----------------------------------------|--------------------------|
| Randomized subjects                       | 251                                     | 124                      |
| Received treatment                        | 251 (100)                               | 123 (99.2)               |
| mITT population                           | 250 (99.6)                              | 122 (98.4)               |
| Safety population                         | 251 (100)                               | 123 (99.2)               |
| Completed double-blind part of each study | 240 (95.6)                              | 110 (88.7)               |
| Withdrew from study                       | 11 (4.4)                                | 13 (10.5)                |
| Consent withdrawn <sup>a</sup>            | 9 (81.8)                                | 13 (100)                 |
| Lost to follow-up <sup>a</sup>            | 2 (18.2)                                | -                        |

**aboBoNT-A solution:** AbobotulinumtoxinA solution for injection, **mITT:** modified intent-to-treat, **n:** number of subjects

Percentages are calculated based on the number of randomized subjects, except when detailing withdrawal reasons (see footnote <sup>a</sup>).

<sup>a</sup> Percentages are based on number of withdrawn subjects
