# Supplementary material for: Liquid AbobotulinumtoxinA: Pooled Data From Two Double-Blind, Randomized, Placebo-Controlled Phase III Studies of Glabellar Line Treatment
Source: PubMed Central journal article supplement — Dermatol Surg. 2022 Oct 7;48(11):1198–202. doi: 10.1097/DSS.0000000000003594 (PMC9632942; doi:10.1097/dss.0000000000003594), 2022-10-07
Supplement: ds-48-1198-s002.pdf [file ds-48-1198-s002.pdf]

**Table S2: Demographics and baseline characteristics**

|                                                                       |           | <b>aboBoNT-A<br/>solution<br/>N=251<sup>a</sup></b> | <b>Placebo<br/>N=124<sup>a</sup></b> |
|-----------------------------------------------------------------------|-----------|-----------------------------------------------------|--------------------------------------|
| <b>Demographics (all randomized subjects)</b>                         |           |                                                     |                                      |
| Age in years                                                          | mean (SD) | 47.7 (9.6)                                          | 47.6 (9.0)                           |
|                                                                       | Range     | 24-65                                               | 24-64                                |
| Sex, n (%)                                                            | Women     | 223 (88.8)                                          | 110 (88.7)                           |
|                                                                       | Men       | 28 (11.2)                                           | 14 (11.3)                            |
| <b>Baseline glabellar line severity (mITT population)<sup>b</sup></b> |           |                                                     |                                      |
| ILA at maximum frown, n (%)                                           | Moderate  | 110 (44.0)                                          | 54 (44.3)                            |
|                                                                       | Severe    | 140 (56.0)                                          | 68 (55.7)                            |
| SSA at maximum frown, n (%)                                           | Moderate  | 131 (52.4)                                          | 51 (41.8)                            |
|                                                                       | Severe    | 119 (47.6)                                          | 71 (58.2)                            |

**aboBoNT-A solution:** AbobotulinumtoxinA solution for injection,

**ILA:** Investigator's live assessment, **mITT:** modified intent-to-treat,

**SSA:** Subject's self-assessment, **n:** number of subjects, **SD:** standard deviation

<sup>a</sup> All randomized subjects: N=251 (aboBoNT-A solution), N=124 (placebo)

<sup>b</sup> mITT population: N=250 (aboBoNT-A solution), N=122 (placebo)
