# Supplementary material for: Liquid AbobotulinumtoxinA: Pooled Data From Two Double-Blind, Randomized, Placebo-Controlled Phase III Studies of Glabellar Line Treatment
Source: PubMed Central journal article supplement — Dermatol Surg. 2022 Oct 7;48(11):1198–202. doi: 10.1097/DSS.0000000000003594 (PMC9632942; doi:10.1097/dss.0000000000003594), 2022-10-07
Supplement: ds-48-1198-s003.pdf [file ds-48-1198-s003.pdf]

Figure S1: None-or-mild glabellar line severity at rest, Investigator live assessment

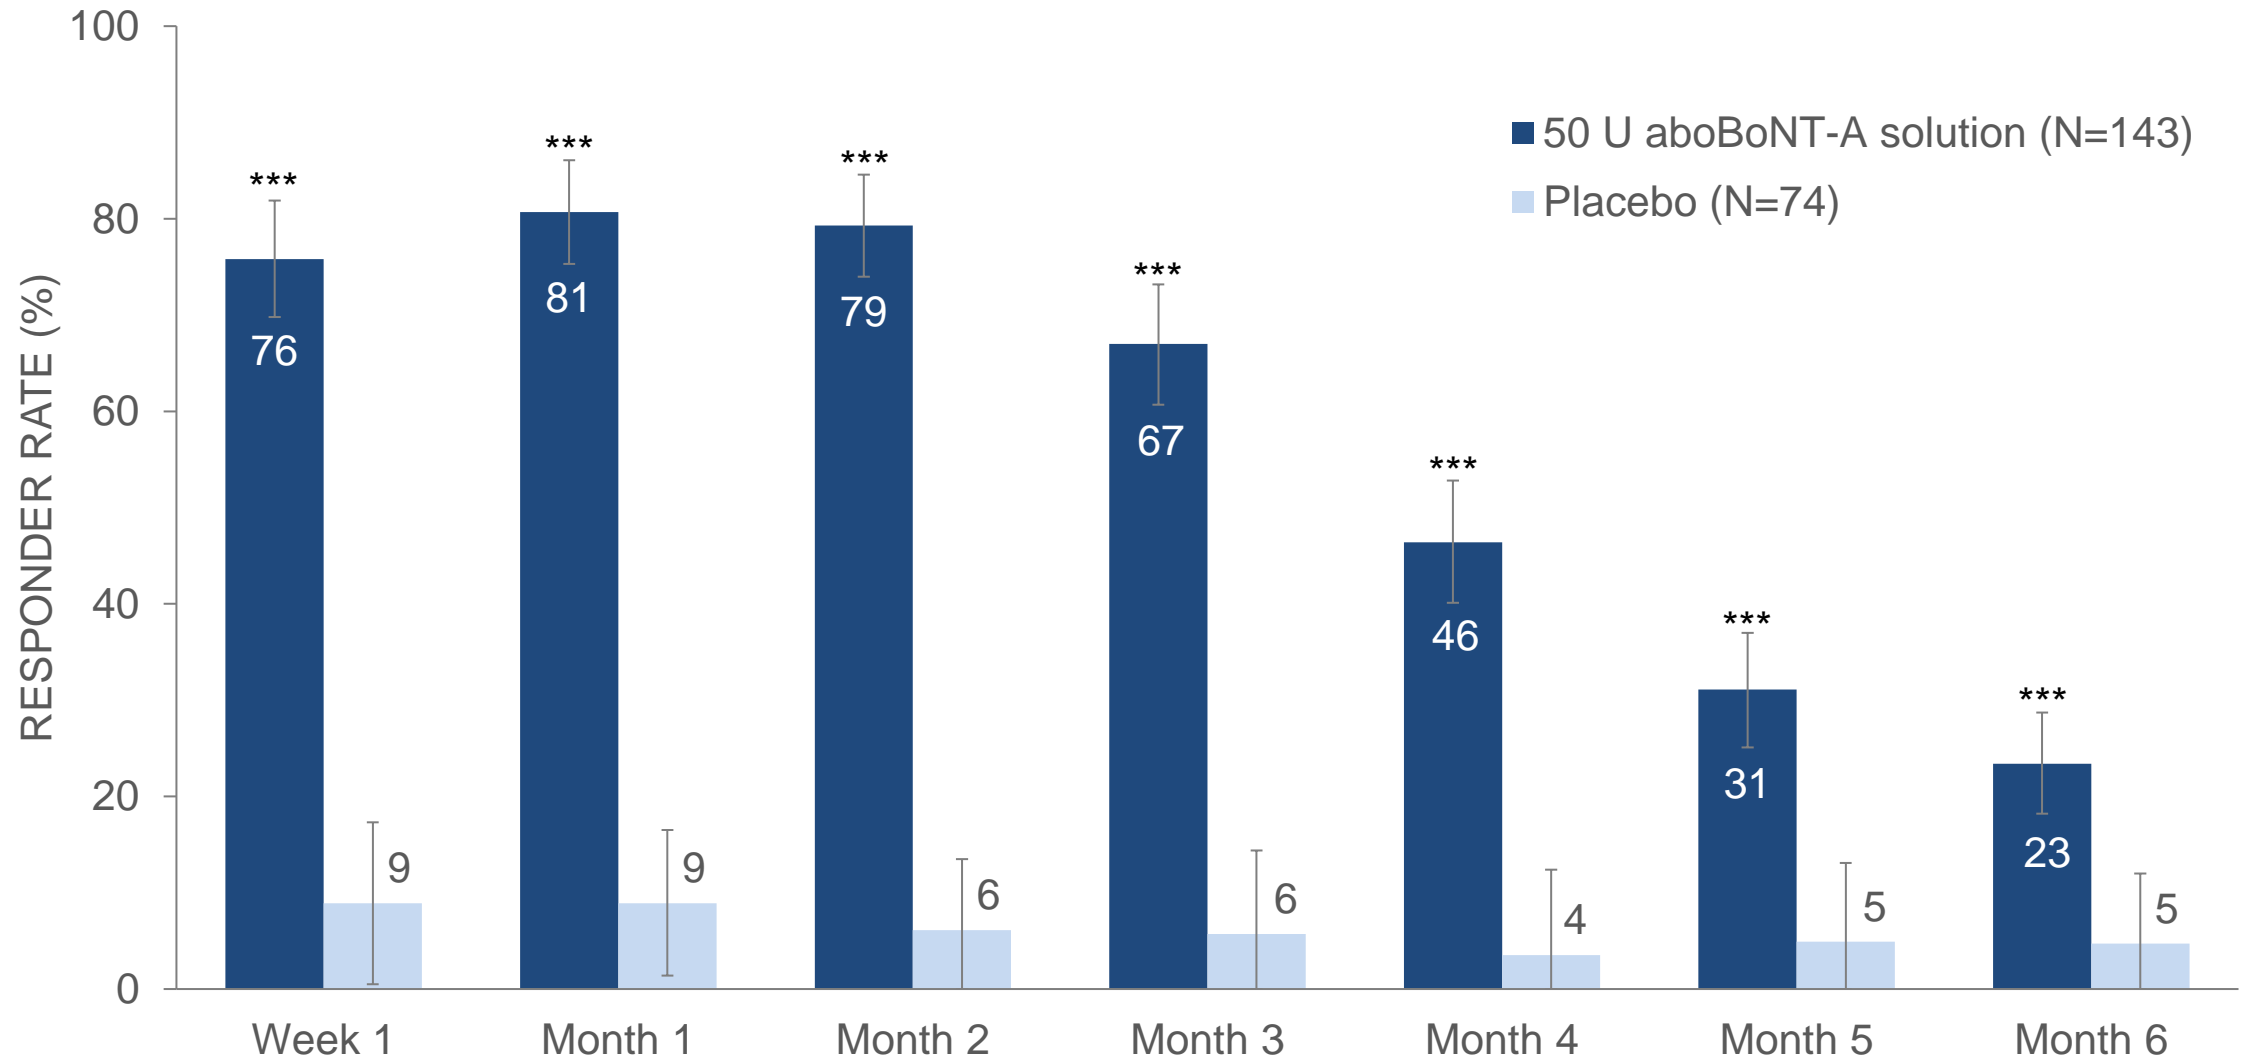

mITT population; Error bars show 95% confidence intervals. \*\*\*p<0.0001 versus placebo

<sup>a</sup> Responders had improved from moderate (Grade 2) or severe (Grade 3) at baseline to none (Grade 0) or mild (Grade 1) post-treatment
