# Supplementary material for: Liquid AbobotulinumtoxinA: Pooled Data From Two Double-Blind, Randomized, Placebo-Controlled Phase III Studies of Glabellar Line Treatment
Source: PubMed Central journal article supplement — Dermatol Surg. 2022 Oct 7;48(11):1198–202. doi: 10.1097/DSS.0000000000003594 (PMC9632942; doi:10.1097/dss.0000000000003594), 2022-10-07
Supplement: ds-48-1198-s004.pdf [file ds-48-1198-s004.pdf]

Figure S2:  $\geq 1$ -grade improvement in glabellar line severity at rest, Investigator live assessment

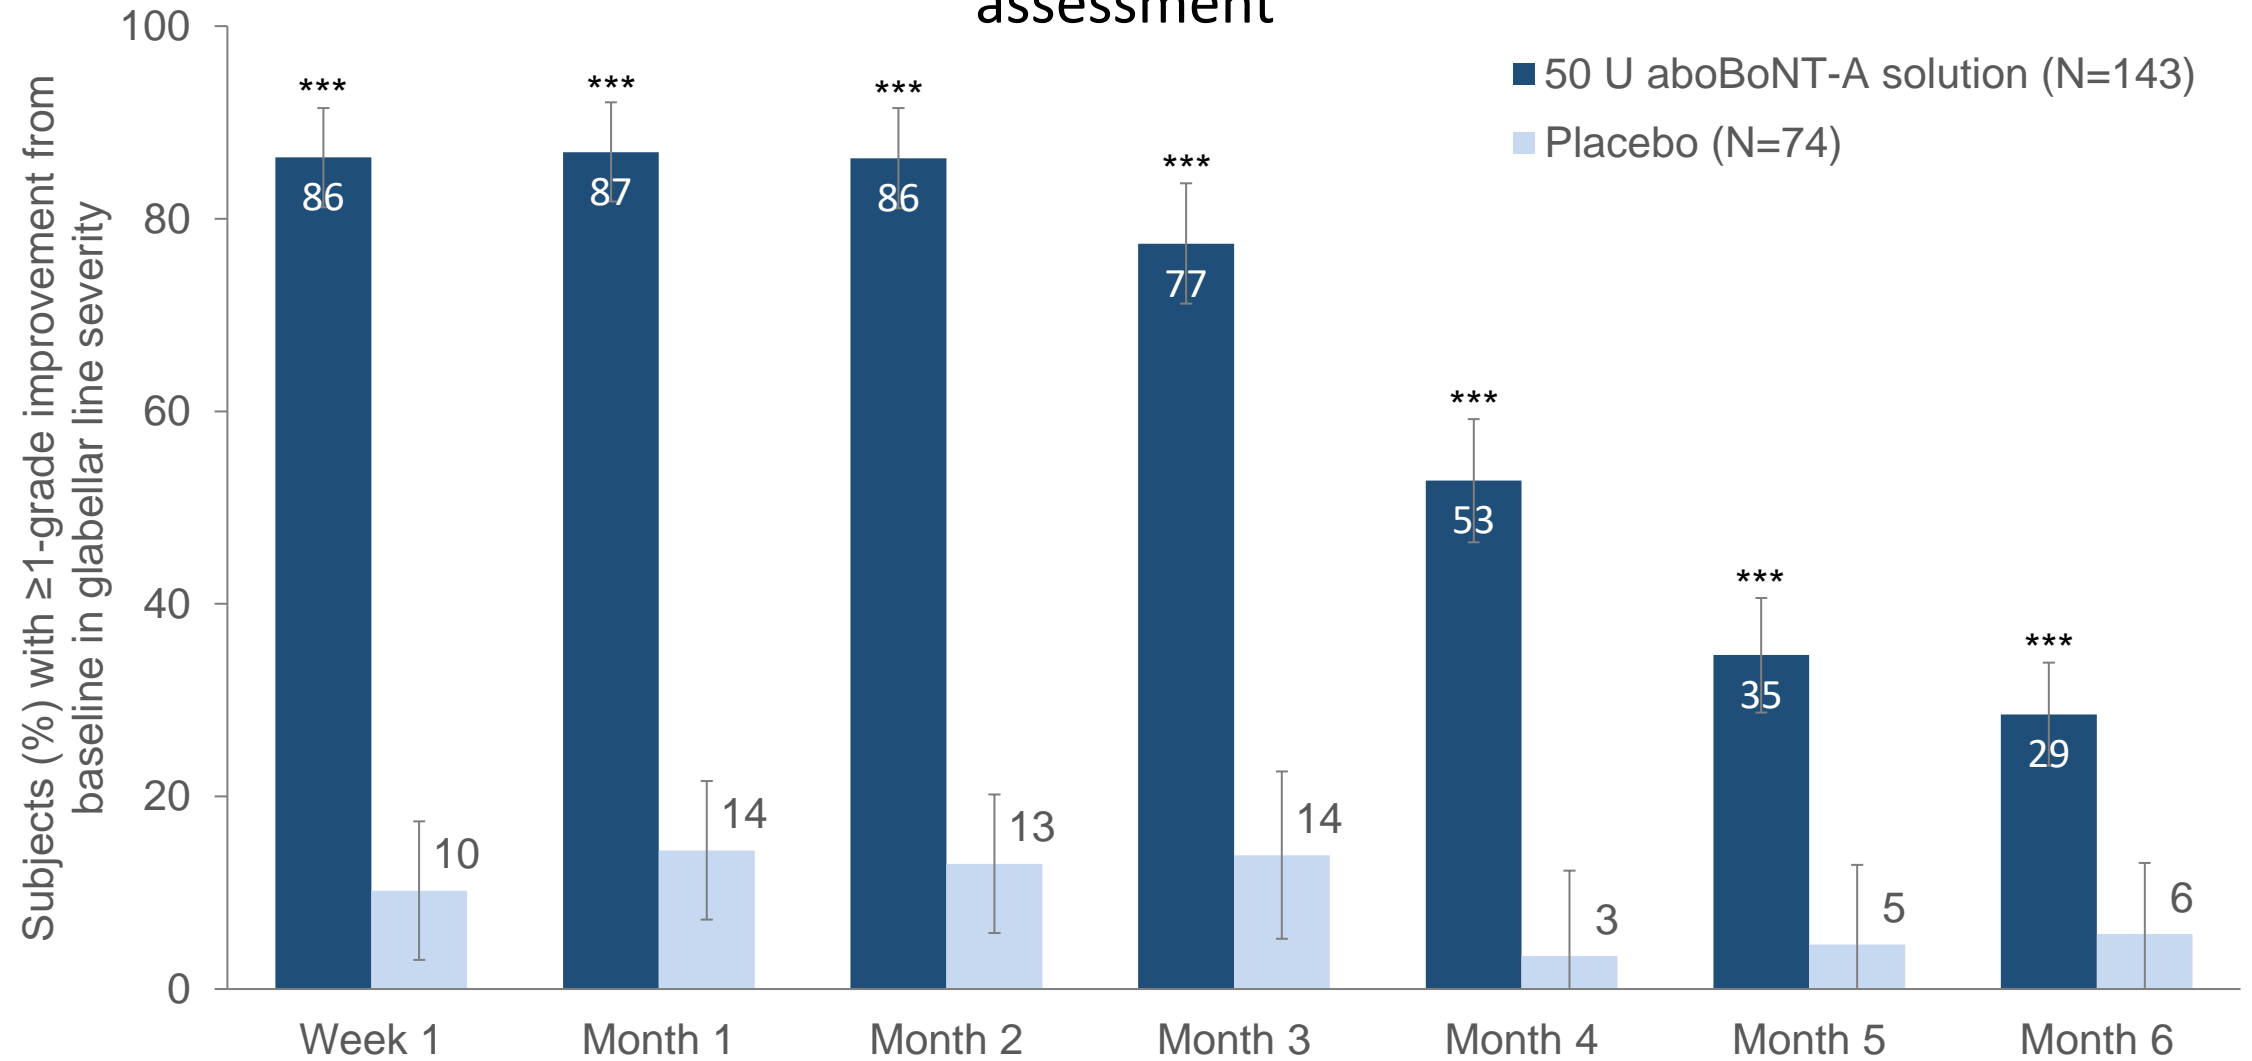

mITT population; Error bars show 95% confidence intervals. \*\*\* $p < 0.0001$  versus placebo
