# Supplementary material for: Liquid AbobotulinumtoxinA: Pooled Data From Two Double-Blind, Randomized, Placebo-Controlled Phase III Studies of Glabellar Line Treatment
Source: PubMed Central journal article supplement — Dermatol Surg. 2022 Oct 7;48(11):1198–202. doi: 10.1097/DSS.0000000000003594 (PMC9632942; doi:10.1097/dss.0000000000003594), 2022-10-07
Supplement: ds-48-1198-s005.pdf [file ds-48-1198-s005.pdf]

**Table S3: Subject-reported onset of effect in the 7-day diary (mITT population)**

|       | <b>Cumulative proportion of subjects reporting onset in the aboBoNT-A solution group (N=250)</b> | <b>Cumulative proportion of subjects reporting onset in the responder subgroup<sup>a</sup> of the aboBoNT-A solution group (N=219)</b> |
|-------|--------------------------------------------------------------------------------------------------|----------------------------------------------------------------------------------------------------------------------------------------|
| Day 1 | 23%                                                                                              | 24%                                                                                                                                    |
| Day 2 | 49%                                                                                              | 53% (median onset)                                                                                                                     |
| Day 3 | 64% (median onset)                                                                               | 68%                                                                                                                                    |
| Day 4 | 75%                                                                                              | 80%                                                                                                                                    |
| Day 5 | 82%                                                                                              | 86%                                                                                                                                    |
| Day 6 | 85%                                                                                              | 88%                                                                                                                                    |
| Day 7 | 86%                                                                                              | 90%                                                                                                                                    |

<sup>a</sup> The responder subgroup included all subjects who were none-or-mild responders for ILA at maximum frown, at Month 1.

**For placebo**, no median values of time to onset could be calculated due to few subjects reporting an onset of effect in the diary, i.e. 19/121 subjects (16%), mITT population. Three placebo subjects were included in the ILA-responder subgroup at Month 1.
