# Supplementary material for: Liquid AbobotulinumtoxinA: Pooled Data From Two Double-Blind, Randomized, Placebo-Controlled Phase III Studies of Glabellar Line Treatment
Source: PubMed Central journal article supplement — Dermatol Surg. 2022 Oct 7;48(11):1198–202. doi: 10.1097/DSS.0000000000003594 (PMC9632942; doi:10.1097/dss.0000000000003594), 2022-10-07
Supplement: ds-48-1198-s006.pdf [file ds-48-1198-s006.pdf]

**Figure S3: Subjects' psychological well-being (change in FACE-Q total score), mITT population**

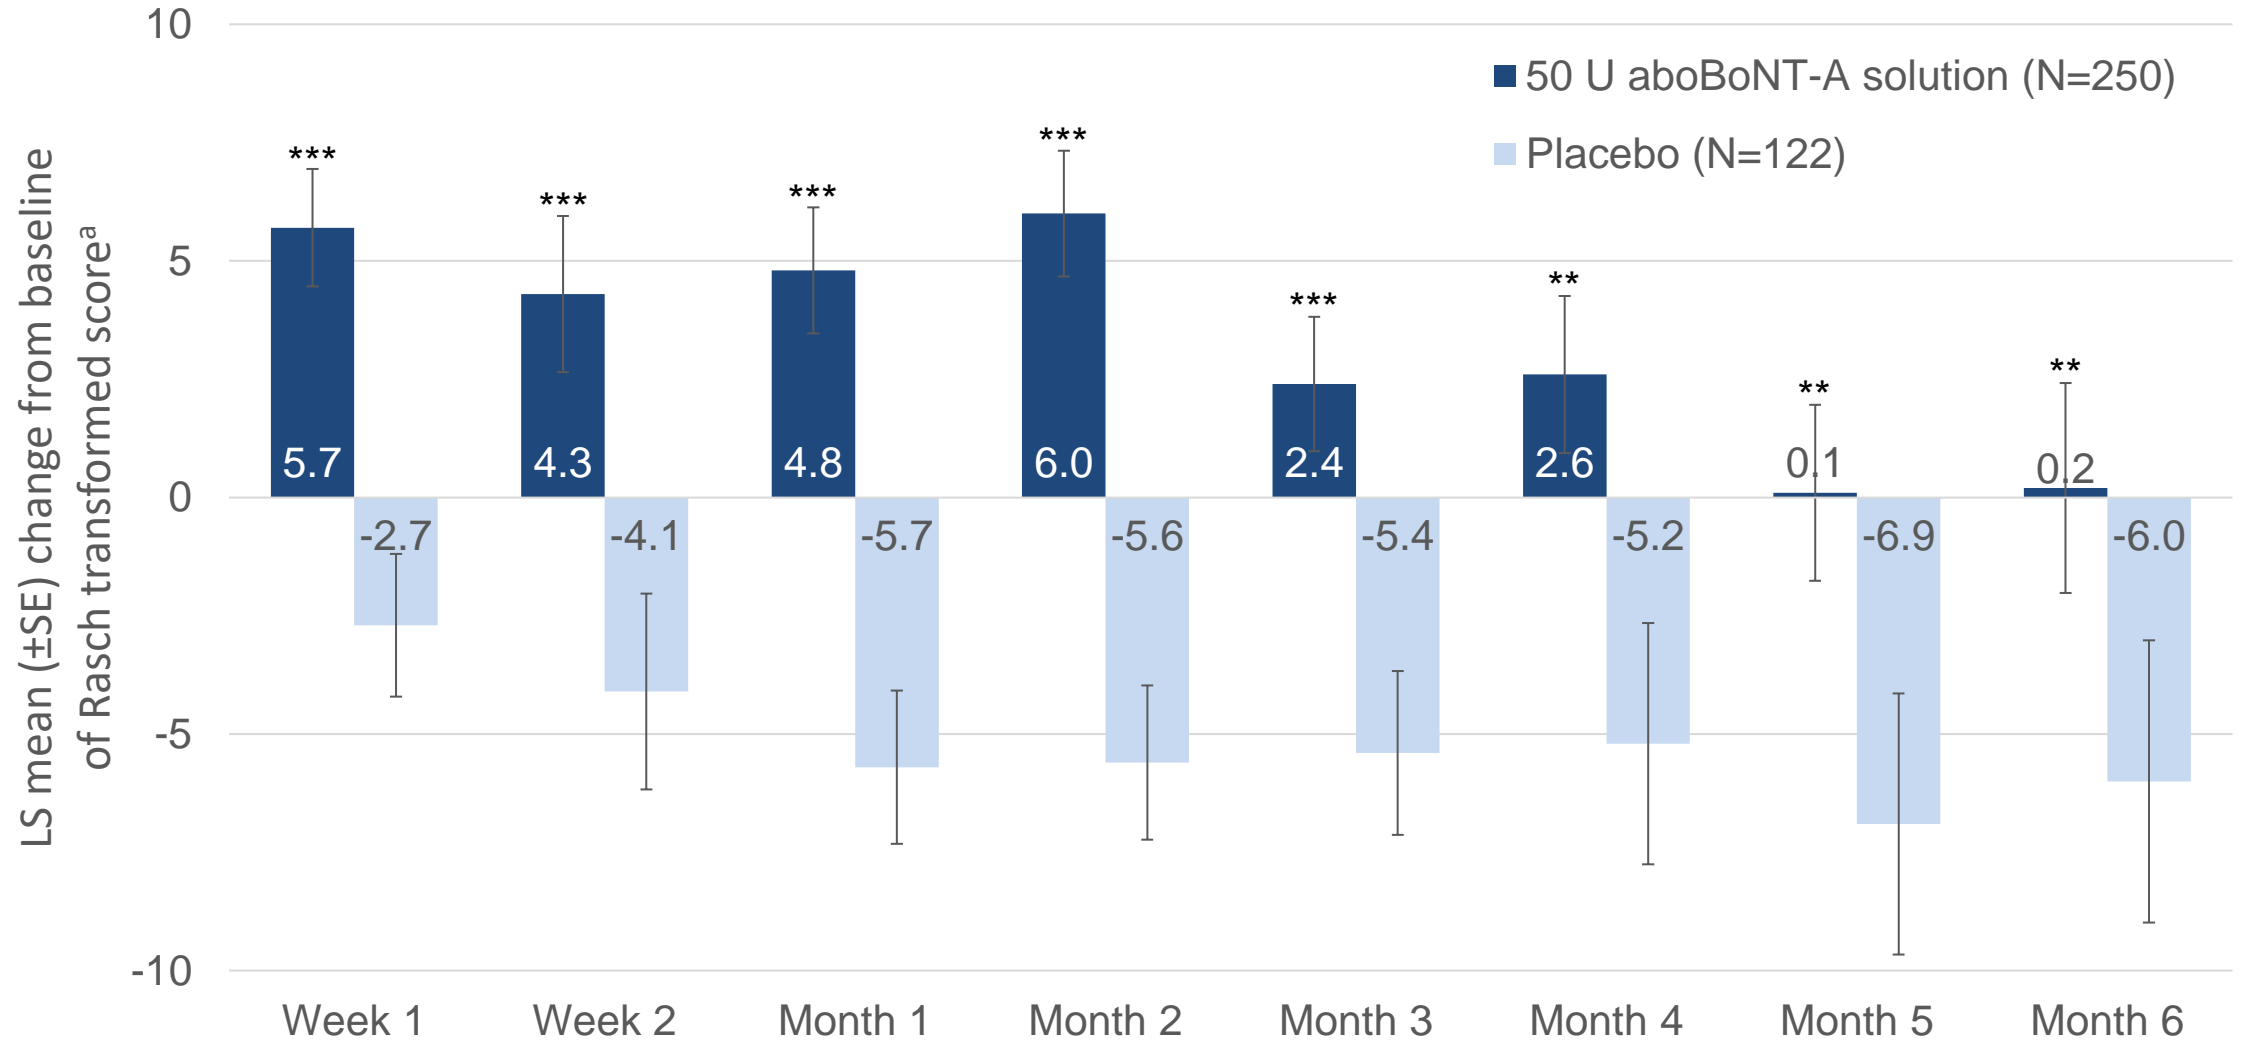

LS mean: least squares mean, SE: standard error; \*\*p<0.01 versus placebo; \*\*\*p≤0.0001 versus placebo

<sup>a</sup>The scale comprised 10 items, each rated on a 4-point scale from 'definitely disagree' (1) to 'definitely agree' (4). A greater positive change in the Rasch-transformed total score of the 10 items reflects a better outcome.

1/51 subject in the placebo group was excluded from analysis at Month 6 post-hoc as it was assessed that the subject had reversed their rating.
