# Supplementary material for: Liquid AbobotulinumtoxinA: Pooled Data From Two Double-Blind, Randomized, Placebo-Controlled Phase III Studies of Glabellar Line Treatment
Source: PubMed Central journal article supplement — Dermatol Surg. 2022 Oct 7;48(11):1198–202. doi: 10.1097/DSS.0000000000003594 (PMC9632942; doi:10.1097/dss.0000000000003594), 2022-10-07
Supplement: ds-48-1198-s008.pdf [file ds-48-1198-s008.pdf]

**Table S4: Overview of adverse events**

|                                      | <b>aboBoNT-A solution,<br/>N=251</b> | <b>Placebo,<br/>N=123</b> |
|--------------------------------------|--------------------------------------|---------------------------|
| <b>Any TEAE, n (%)</b>               | <b>101 (40.2)</b>                    | <b>42 (34.1)</b>          |
| Serious <sup>a</sup> , n (%)         | 3 (1.2)                              | 3 (2.4)                   |
| <b>Treatment-related TEAE, n (%)</b> | <b>43 (17.1)</b>                     | <b>7 (5.7)</b>            |
| Serious, n (%)                       | 0                                    | 0                         |
| Most common <sup>b</sup> , n (%)     |                                      |                           |
| Headache                             | 16 (6.4)                             | 3 (2.4)                   |
| Injection-site pain                  | 10 (4.0)                             | 3 (2.4)                   |
| Haematoma                            | 5 (2.0)                              | 0                         |
| Eyelid oedema                        | 4 (1.6)                              | 0                         |
| Brow ptosis                          | 3 (1.2)                              | 0                         |
| Head discomfort                      | 1 (0.4)                              | 1 (0.8)                   |

**aboBoNT-A solution:** AbobotulinumtoxinA solution for injection, **n:** number of subjects, **TEAE:** treatment-emergent adverse event

<sup>a</sup> No serious adverse events led to death or subject withdrawal

<sup>b</sup> Reported for >1 subject in total during the double-blind period.

All treatment-related TEAEs were mild or moderate.
